# Supplementary material for: Photoreversible solid state negative photochromism of N-(3,5-dichlorosalicylidene)-1-aminopyrene
Source: Royal Society of Chemistry journal article supplement (doi:10.1039/c4ce00589a), 2014-01-01
Supplement: c4ce00589a1.pdf [file c4ce00589a1.pdf]

## Electronic Supplementary Information

### Photoreversible negative photochromism in N-(3,5-dichlorosalicylidene)-1-aminopyrene

Damir A. Safin,<sup>a</sup> Michael Bolte<sup>b</sup> and Yann Garcia\*<sup>a</sup>

<sup>a</sup> Institute of Condensed Matter and Nanosciences, Molecules, Solids & Reactivity (IMCN/MOST), Université Catholique de Louvain, Place L. Pasteur 1, 1348 Louvain-la-Neuve, Belgium. Fax: +32(0) 1047 2330; Tel: +32(0) 1047 2831; E-mail: yann.garcia@uclouvain.be

<sup>b</sup> Institut für Anorganische Chemie J.-W.-Goethe-Universität, Frankfurt/Main, Germany

#### General procedures

The NMR spectrum in CDCl<sub>3</sub> was obtained on a Bruker AC 300 MHz spectrometer at 25 °C. Chemical shifts are reported with reference to SiMe<sub>4</sub>. Elemental analysis was performed on a Perkin Elmer 2400 CHN microanalyser. Diffuse reflectance spectra were obtained with a Varian Cary 5E spectrometer using polytetrafluoroethylene (PTFE) as a reference. The solid-state emission spectrum was obtained with a Fluorolog-3 (Jobin-Yvon-Spex Company) spectrometer. Kubelka Munk and emission spectra were normalized to allow meaningful comparisons. Light irradiations were carried out with a LOT-ORIEL 200 W high-pressure mercury Arc lamp (LSN261) equipped with suitable filters.

#### Synthesis of N-(3,5-dichlorosalicylidene)-1-aminopyrene (1)

A solution of 1-aminopyrene (0.5 mmol, 0.109 g) dissolved in ethanol (20 mL) was added to a solution of 3,5-dichlorosalicylaldehyde (0.55 mmol, 0.105 g) in the same solvent (10 mL). The resulting dark red solution was stirred for 30 min and, afterwards, heated at reflux for 2 h. It was then allowed to cool to room temperature to give red plates, which were filtered, washed with ethanol (10 mL) and *n*-hexane (3 × 50 mL), and dried under vacuum.

Yield: 0.168 g (86%). <sup>1</sup>H NMR: δ = 7.39 (d, <sup>4</sup>J<sub>H,H</sub> = 2.6 Hz, 1H, 4-H, C<sub>6</sub>H<sub>2</sub>), 7.52 (d, <sup>4</sup>J<sub>H,H</sub> = 2.6 Hz, 1H, 6-H, C<sub>6</sub>H<sub>2</sub>), 7.82 (d, <sup>3</sup>J<sub>H,H</sub> = 8.6 Hz, 1H, pyrene), 8.01–8.10 (m, 3H, pyrene), 8.13–8.26 (m, 4H, pyrene), 8.49 (d, <sup>3</sup>J<sub>H,H</sub> = 8.6 Hz, 1H, pyrene), 8.79 (s, 1H, CHN), 14.67 (s, 1H, OH) ppm. *Anal.* Calc. for C<sub>23</sub>H<sub>13</sub>Cl<sub>2</sub>NO (390.27): C 70.79, H 3.36, N 3.59. Found: C 70.93, H 3.42, N 3.66.

#### X-Ray crystallography

The X-ray data for **1** were collected at 173(2) K on a STOE IPDS-II diffractometer with graphite-monochromatised Mo-K<sub>α</sub> radiation generated by a fine-focus X-ray tube operated at 50 kV and 40 mA. The reflections of the images were indexed, integrated and scaled using the X-Area data reduction package.<sup>1</sup> Data were corrected for absorption using the PLATON program.<sup>2</sup> The structures were solved by direct methods

using the SHELXS-97 program<sup>3</sup> and refined first isotropically and then anisotropically using SHELXL-97.<sup>3</sup> Hydrogen atoms were revealed from  $\Delta\rho$  maps and those bonded to C were refined using appropriate riding models. Figures were generated using the program Mercury.<sup>4</sup>

$C_{23}H_{13}Cl_2NO$ ,  $M_r = 355.80 \text{ g mol}^{-1}$ , triclinic, space group  $P\bar{1}$ ,  $a = 7.8740(13)$ ,  $b = 8.3670(14)$ ,  $c = 13.195(2)$  Å,  $\alpha = 91.615(14)$ ,  $\beta = 103.438(13)$ ,  $\gamma = 90.080(14)^\circ$ ,  $V = 845.1(2) \text{ \AA}^3$ ,  $Z = 2$ ,  $\rho = 1.534 \text{ g cm}^{-3}$ ,  $\mu(\text{Mo-K}\alpha) = 0.398 \text{ mm}^{-1}$ , reflections: 8702 collected, 3157 unique,  $R_{\text{int}} = 0.0948$ ,  $R_1(\text{all}) = 0.0613$ ,  $wR_2(\text{all}) = 0.1249$ .

CCDC 978838 contains the supplementary crystallographic data. These data can be obtained free of charge via <http://www.ccdc.cam.ac.uk/conts/retrieving.html>, or from the Cambridge Crystallographic Data Centre, 12 Union Road, Cambridge CB2 1EZ, UK; fax: (+44) 1223-336-033; or e-mail: [deposit@ccdc.cam.ac.uk](mailto:deposit@ccdc.cam.ac.uk).

## References

- 1 Stoe & Cie. X-Area. Area-Detector Control and Integration Software. Stoe & Cie, Darmstadt, Germany, 2001.
- 2 A. L. Spek, *Acta Crystallogr.*, 2009, **D65**, 148.
- 3 G. M. Sheldrick, *Acta Crystallogr.*, 2008, **A64**, 112.
- 4 I. J. Bruno, J. C. Cole, P. R. Edgington, M. Kessler, C. F. Macrae, P. McCabe, J. Pearson and R. Taylor, *Acta Crystallogr.*, 2002, **B58**, 389.

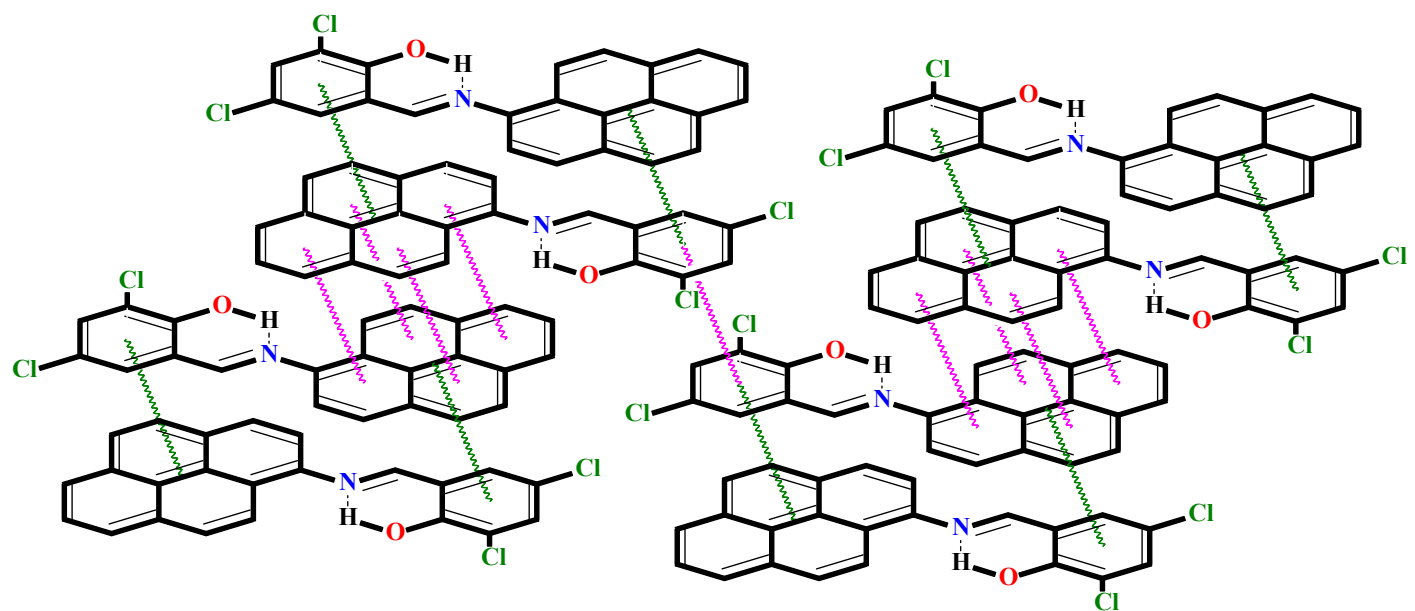

**Chart S1** Simplified line diagram of  $\pi \cdots \pi$  stacking interactions in the crystal structure of **1**. The head-to-head and head-to-tail interactions are shown in pink and green, respectively.

**Table S3** Selected bond lengths (Å) and bond angles (°) for **1**

| <i>Bond lengths</i>   |            |                      |            |                   |            |
|-----------------------|------------|----------------------|------------|-------------------|------------|
| Cl(1)–C(23)           | 1.729(2)   | C(5)–C(6)            | 1.433(3)   | C(13)–C(14)       | 1.400(3)   |
| Cl(2)–C(25)           | 1.740(2)   | C(6)–C(7)            | 1.400(3)   | C(13)–C(17)       | 1.432(3)   |
| O(1)–C(22)            | 1.337(3)   | C(6)–C(16)           | 1.423(3)   | C(14)–C(15)       | 1.375(3)   |
| N(1)–C(1)             | 1.284(3)   | C(7)–C(8)            | 1.389(4)   | C(16)–C(17)       | 1.427(3)   |
| N(1)–C(2)             | 1.412(3)   | C(8)–C(9)            | 1.381(3)   | C(21)–C(22)       | 1.417(3)   |
| C(1)–C(21)            | 1.454(3)   | C(9)–C(10)           | 1.403(3)   | C(21)–C(26)       | 1.403(3)   |
| C(2)–C(3)             | 1.412(3)   | C(10)–C(11)          | 1.439(3)   | C(22)–C(23)       | 1.393(3)   |
| C(2)–C(15)            | 1.403(3)   | C(10)–C(16)          | 1.416(3)   | C(23)–C(24)       | 1.381(3)   |
| C(3)–C(4)             | 1.434(3)   | C(11)–C(12)          | 1.355(3)   | C(24)–C(25)       | 1.392(3)   |
| C(3)–C(17)            | 1.417(3)   | C(12)–C(13)          | 1.423(3)   | C(25)–C(26)       | 1.369(3)   |
| C(4)–C(5)             | 1.353(3)   |                      |            |                   |            |
| <i>Bond angles</i>    |            |                      |            |                   |            |
| C(1)–N(1)–C(2)        | 121.82(18) | C(6)–C(16)–C(17)     | 119.5(2)   | C(14)–C(15)–C(2)  | 120.8(2)   |
| N(1)–C(1)–C(21)       | 120.99(19) | C(7)–C(6)–C(5)       | 123.0(2)   | C(15)–C(2)–C(3)   | 119.7(2)   |
| C(3)–C(2)–N(1)        | 117.38(17) | C(7)–C(6)–C(16)      | 118.8(2)   | C(15)–C(14)–C(13) | 121.81(18) |
| C(15)–C(2)–N(1)       | 122.71(19) | C(8)–C(7)–C(6)       | 120.9(2)   | C(16)–C(6)–C(5)   | 118.3(2)   |
| O(1)–C(22)–C(23)      | 120.18(19) | C(8)–C(9)–C(10)      | 120.9(2)   | C(16)–C(10)–C(11) | 119.2(2)   |
| O(1)–C(22)–C(21)      | 121.7(2)   | C(9)–C(8)–C(7)       | 120.4(2)   | C(16)–C(17)–C(13) | 118.9(2)   |
| C(22)–C(23)–Cl(1)     | 119.26(17) | C(9)–C(10)–C(11)     | 121.9(2)   | C(17)–C(3)–C(4)   | 118.3(2)   |
| C(24)–C(23)–Cl(1)     | 118.63(17) | C(9)–C(10)–C(16)     | 119.0(2)   | C(22)–C(21)–C(1)  | 120.8(2)   |
| C(24)–C(25)–Cl(2)     | 118.75(18) | C(10)–C(16)–C(6)     | 120.0(2)   | C(23)–C(22)–C(21) | 118.1(2)   |
| C(26)–C(25)–Cl(2)     | 120.15(17) | C(10)–C(16)–C(17)    | 120.51(18) | C(23)–C(24)–C(25) | 118.9(2)   |
| C(2)–C(3)–C(4)        | 122.5(2)   | C(11)–C(12)–C(13)    | 122.30(19) | C(24)–C(23)–C(22) | 122.09(19) |
| C(2)–C(3)–C(17)       | 119.17(18) | C(12)–C(11)–C(10)    | 120.2(2)   | C(25)–C(26)–C(21) | 120.25(19) |
| C(3)–C(17)–C(13)      | 120.5(2)   | C(12)–C(13)–C(17)    | 119.0(2)   | C(26)–C(21)–C(1)  | 119.59(19) |
| C(3)–C(17)–C(16)      | 120.65(18) | C(14)–C(13)–C(12)    | 123.06(18) | C(26)–C(21)–C(22) | 119.6(2)   |
| C(4)–C(5)–C(6)        | 122.05(19) | C(14)–C(13)–C(17)    | 118.0(2)   | C(26)–C(25)–C(24) | 121.1(2)   |
| C(5)–C(4)–C(3)        | 121.0(2)   |                      |            |                   |            |
| <i>Torsion angles</i> |            |                      |            |                   |            |
| C(1)–N(1)–C(2)–C(3)   | 160.6(2)   | C(1)–N(1)–C(2)–C(15) | –24.6(3)   |                   |            |

**Table S2.** Hydrogen bond lengths (Å) and angles (°) for **1**

| D–H···A              | <i>d</i> (D–H) | <i>d</i> (H···A) | <i>d</i> (D···A) | ∠(DHA) |
|----------------------|----------------|------------------|------------------|--------|
| O(1A)–H(10A)···N(1A) | 0.84(4)        | 1.77(3)          | 2.577(2)         | 159(3) |

**Table S3.**  $\pi\cdots\pi$  bond lengths (Å) and angles (°) for **1**<sup>a</sup>

| Cg( <i>I</i> ) | Cg( <i>J</i> )      | <i>d</i> [Cg( <i>I</i> )–Cg( <i>J</i> )] | $\alpha$ | $\beta$ |
|----------------|---------------------|------------------------------------------|----------|---------|
| Cg(1)          | Cg(1) <sup>#1</sup> | 4.3405(16)                               | 0.00     | 36.87   |
| Cg(1)          | Cg(1) <sup>#2</sup> | 4.6370(16)                               | 0.00     | 43.97   |
| Cg(1)          | Cg(2) <sup>#1</sup> | 3.8427(16)                               | 3.38     | 23.93   |
| Cg(1)          | Cg(2) <sup>#2</sup> | 4.8675(17)                               | 3.38     | 47.36   |
| Cg(1)          | Cg(3) <sup>#1</sup> | 3.7798(15)                               | 3.98     | 26.18   |
| Cg(1)          | Cg(4) <sup>#1</sup> | 3.5778(15)                               | 2.65     | 17.54   |
| Cg(2)          | Cg(1) <sup>#1</sup> | 3.8428(16)                               | 3.38     | 27.17   |
| Cg(2)          | Cg(1) <sup>#2</sup> | 4.8674(17)                               | 3.38     | 49.19   |
| Cg(2)          | Cg(2) <sup>#1</sup> | 4.7646(16)                               | 0.00     | 44.69   |
| Cg(2)          | Cg(4) <sup>#1</sup> | 3.8347(15)                               | 2.57     | 26.52   |
| Cg(3)          | Cg(1) <sup>#1</sup> | 3.7799(15)                               | 3.98     | 24.8    |
| Cg(3)          | Cg(5) <sup>#2</sup> | 4.4971(16)                               | 30.26    | 27.89   |
| Cg(4)          | Cg(1) <sup>#1</sup> | 3.5778(15)                               | 2.65     | 17.03   |
| Cg(4)          | Cg(2) <sup>#1</sup> | 3.8347(15)                               | 2.57     | 24.2    |
| Cg(4)          | Cg(4) <sup>#1</sup> | 4.3353(15)                               | 0.00     | 36.8    |
| Cg(4)          | Cg(5) <sup>#2</sup> | 4.0737(15)                               | 28.87    | 14.3    |
| Cg(5)          | Cg(3) <sup>#2</sup> | 4.4971(16)                               | 30.26    | 57.7    |
| Cg(5)          | Cg(4) <sup>#2</sup> | 4.0737(15)                               | 28.87    | 33.6    |
| Cg(5)          | Cg(5) <sup>#1</sup> | 3.8615(15)                               | 0.00     | 27.48   |

<sup>a</sup> Cg(*I*)–Cg(*J*): distance between ring centroids;  $\alpha$ : dihedral angle between planes Cg(*I*) and Cg(*J*);  $\beta$ : angle Cg(*I*) → Cg(*J*) vector and normal to plane *I*. Symmetry transformations used to generate equivalent atoms: #1  $1 - x, -y, 1 - z$ ; #2  $1 - x, 1 - y, 1 - z$ ; Cg(1): C(2)–C(3)–C(17)–C(13)–C(14)–C(15), Cg(2): C(3)–C(4)–C(5)–C(6)–C(16)–C(17), Cg(3): C(6)–C(7)–C(8)–C(9)–C(10)–C(16), Cg(4): C(10)–C(11)–C(12)–C(13)–C(17)–C(16), Cg(5): C(21)–C(22)–C(23)–C(24)–C(25)–C(26).
